# Supplementary material for: Electrospinning: a carbonized gold/graphene/PAN nanofiber for high performance biosensing
Source: Royal Society of Chemistry journal article supplement (doi:10.1039/c7ay02880f), 2018-01-01
Supplement: c7ay02880f1.pdf [file c7ay02880f1.pdf]

Supplementary data

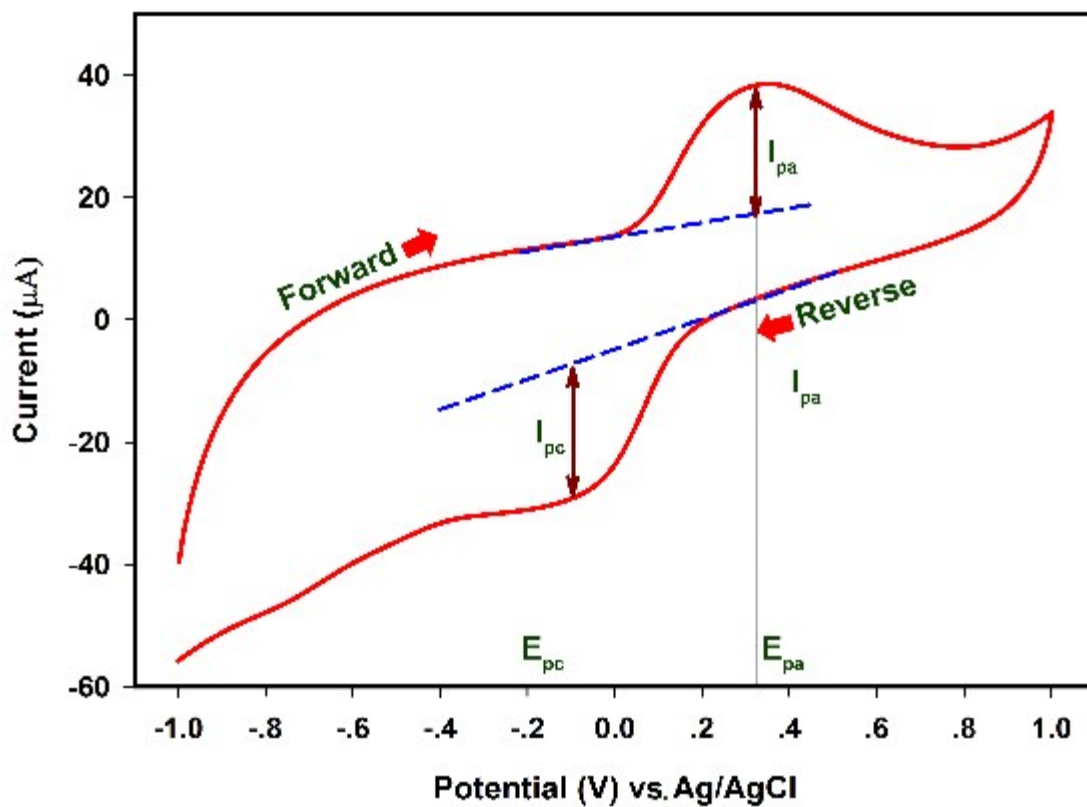

**Figure S1.** Cyclic voltammetry (CV) measurement of  $I_{pa}$ ,  $I_{pc}$ ,  $E_{pa}$ , and  $E_{pc}$  of CPAN-Au/G electrodes with a scanning rate of  $50 \text{ mV s}^{-1}$  in  $1 \text{ mM } [\text{Fe}(\text{CN})_6]^{3-/4-}$  in  $0.1 \text{ M PBS}$  at a pH value of 7.4

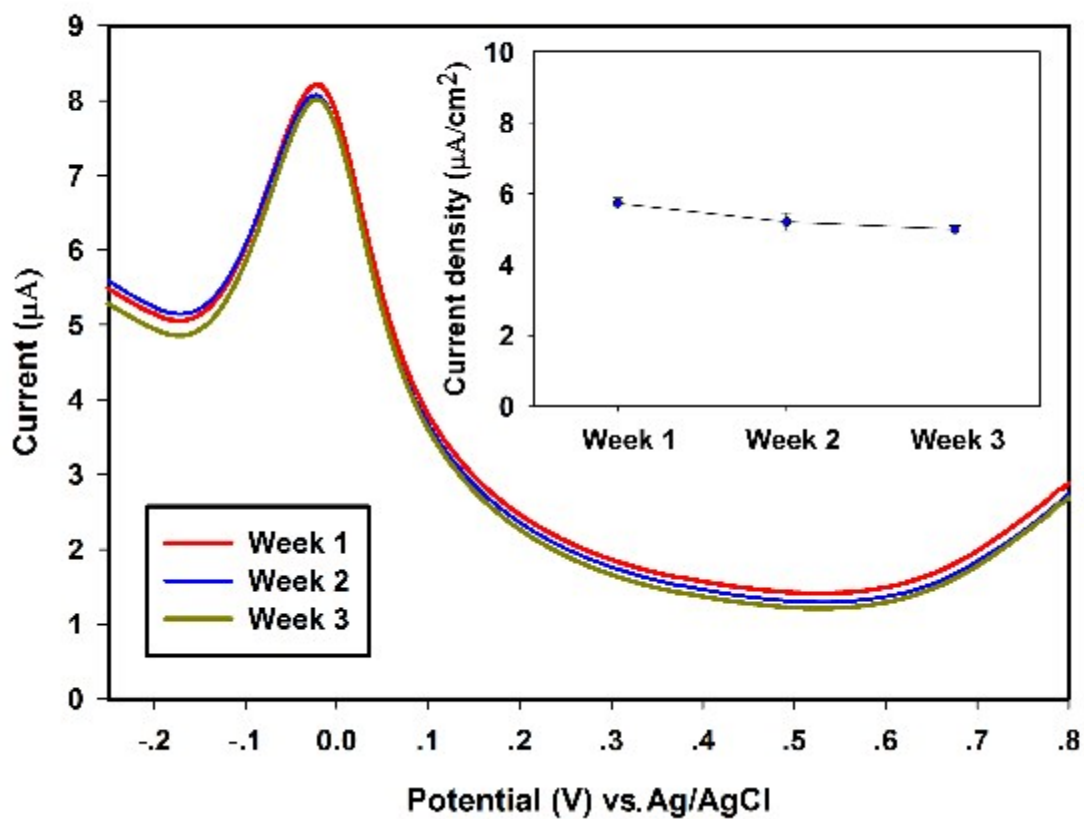

**Figure S2.** DPV profiles of the CPAN-Au/G electrode in the presence of 40  $\mu\text{M}$  DA in 0.1 M PBS solution at a pH value of 7.4 as a function of time
